# Supplementary material for: Mitochondrial heteroplasmy improves risk prediction for myeloid neoplasms
Source: bioRxiv or medRxiv preprint supplement (doi:10.1101/2024.04.07.24305454), 2024-04-08
Supplement: Supplementary file [file media-2.pdf]

**A****UKB**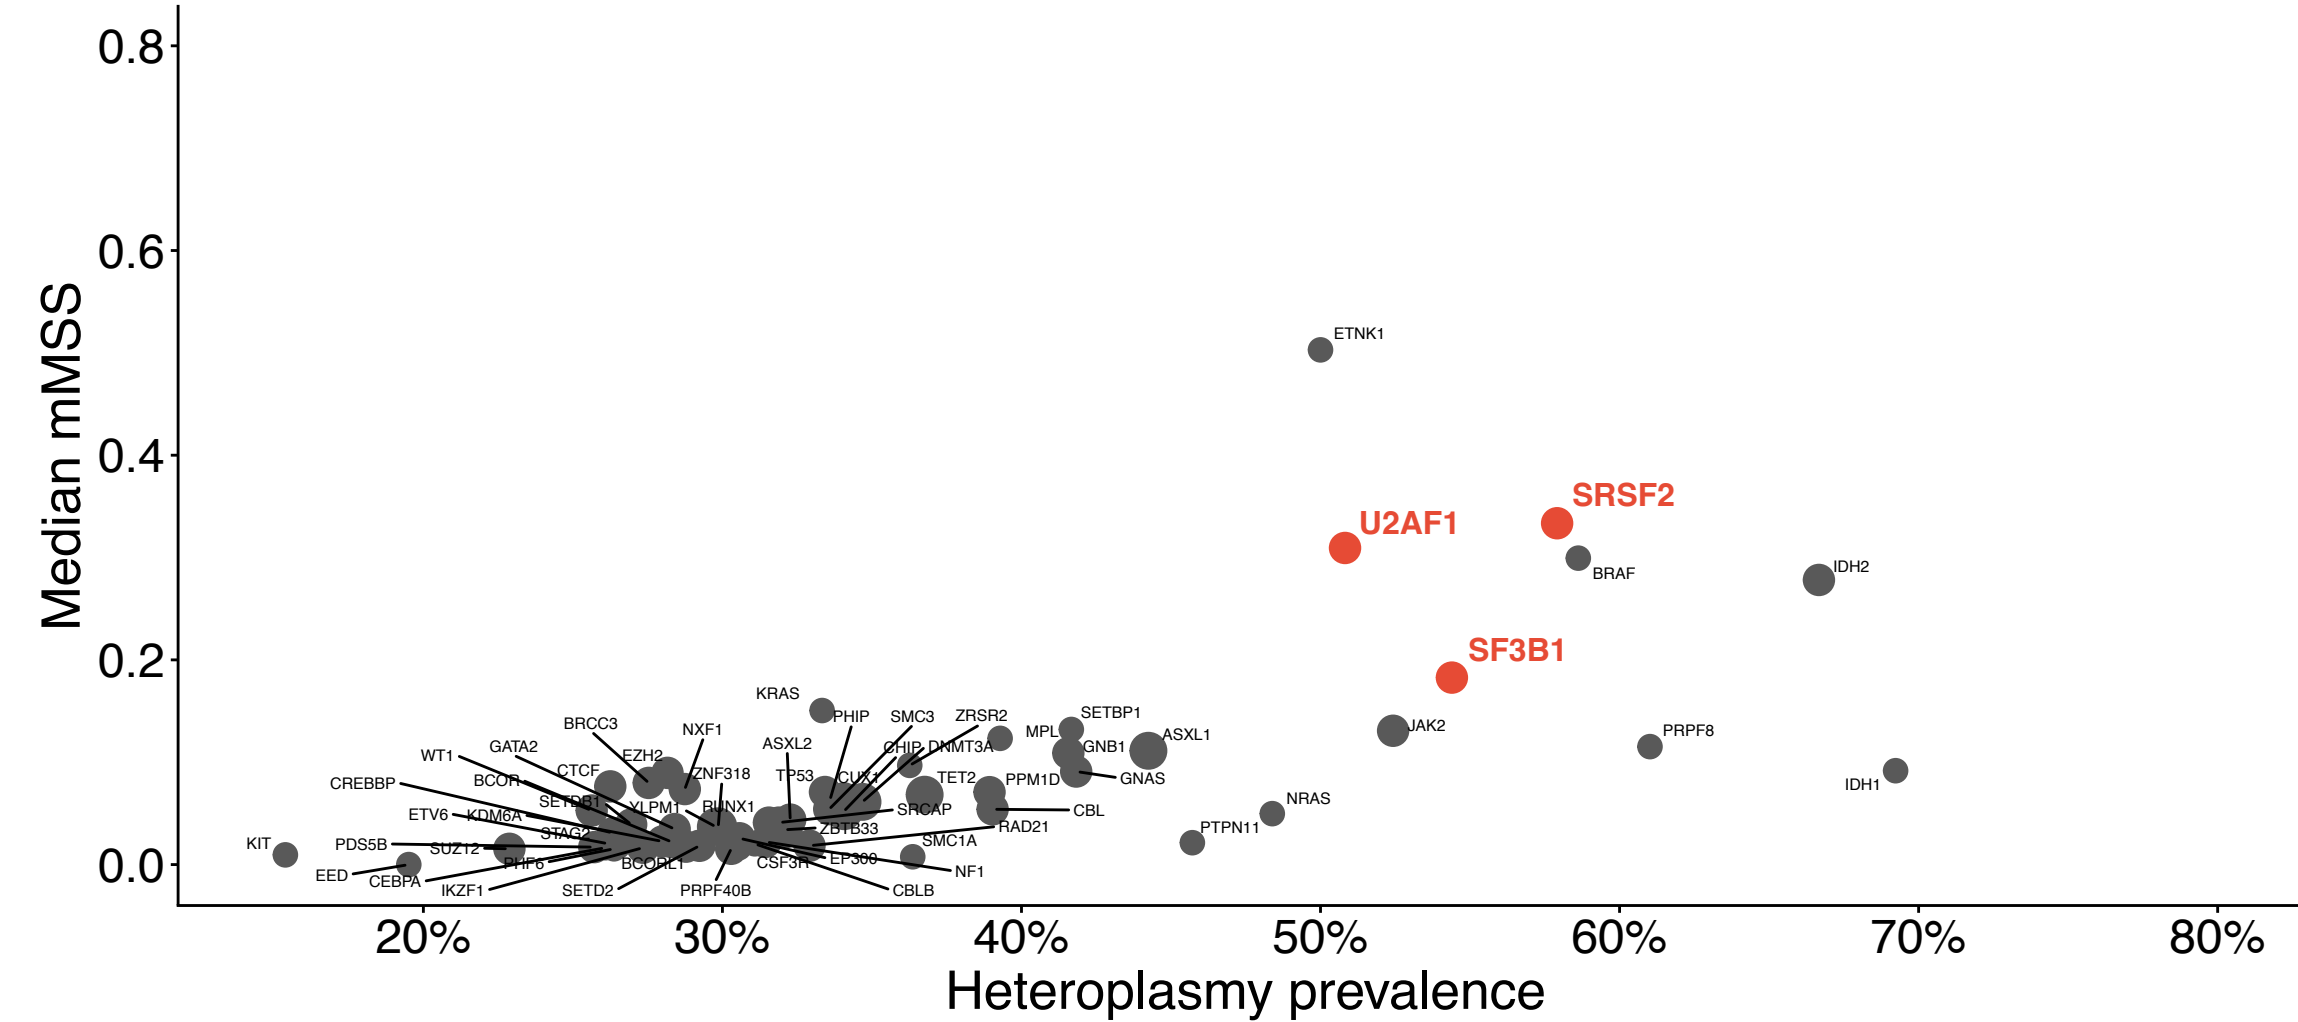

Total number of individuals •  $\leq 10$  •  $10 < n \leq 100$  •  $100 < n \leq 1000$  •  $> 1000$

**B****ARIC**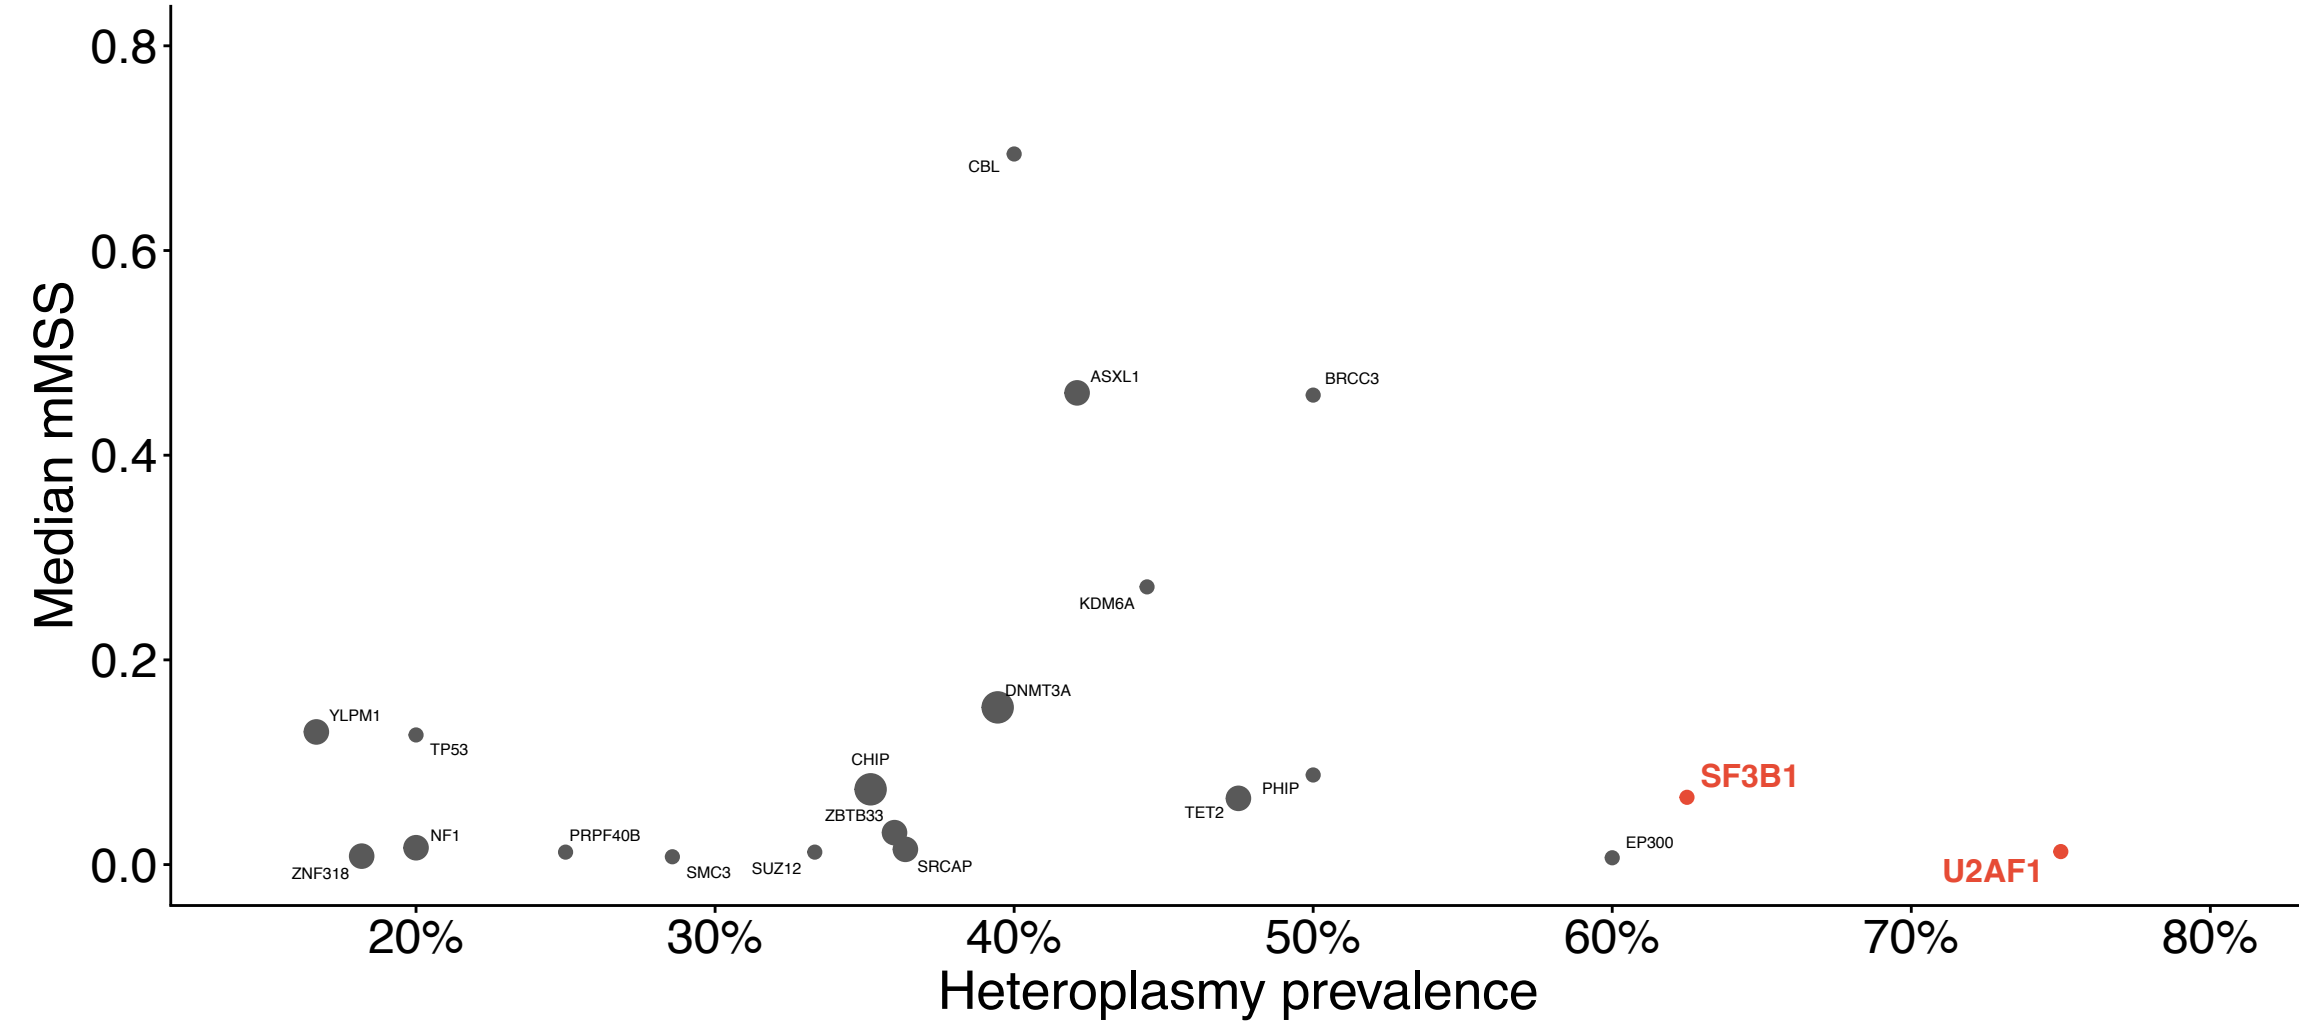

Canonical spliceosome components ■
