# Supplementary material for: Mitochondrial heteroplasmy improves risk prediction for myeloid neoplasms
Source: bioRxiv or medRxiv preprint supplement (doi:10.1101/2024.04.07.24305454), 2024-04-08
Supplement: Supplementary file [file media-10.pdf]

**Participants with MitoHPC run on whole genome sequencing data (n = 12,776)**

**Sample-level exclusion for heteroplasmy (n = 69)**

- Suspicious (n = 57) of having 1) potential mitochondrial contamination at  $\geq 3\%$ , 2)  $\geq 2$  variants belonging to a different mitochondrial haplogroup, 3) multiple variants predicted to be NUMTs, or 4) low minimum base coverage ( $< 100$ ) or low mean base coverage ( $< 500$ )
- mtDNA copy number  $\leq 40$  (n = 1)
- No visit information (n = 1)
- Heteroplasmy count  $\geq 6$  (n = 10)

**Participants with mtDNA heteroplasmy data after QC (n = 12,707)**

**Exclusion due to ineligibility (n = 5,049)**

- No WES data at the same visit (n = 4,340)
- No information on incident MN (n = 709)
- A potential MPN (n = 0)

**Sample-level exclusion for CHIP calls (n = 4)**

- High number of INDELs (n = 3)
- High number of CHIP variants (n = 1)

**Exclusion due to missing data (n = 22)**

- Missing smoking status (n = 22)

**Study participants (n = 7,632)**
