# Supplementary material for: Mitochondrial heteroplasmy improves risk prediction for myeloid neoplasms
Source: bioRxiv or medRxiv preprint supplement (doi:10.1101/2024.04.07.24305454), 2024-04-08

VAF cutoff ● VAF 3% ● VAF 5% ● VAF 10%

**A**

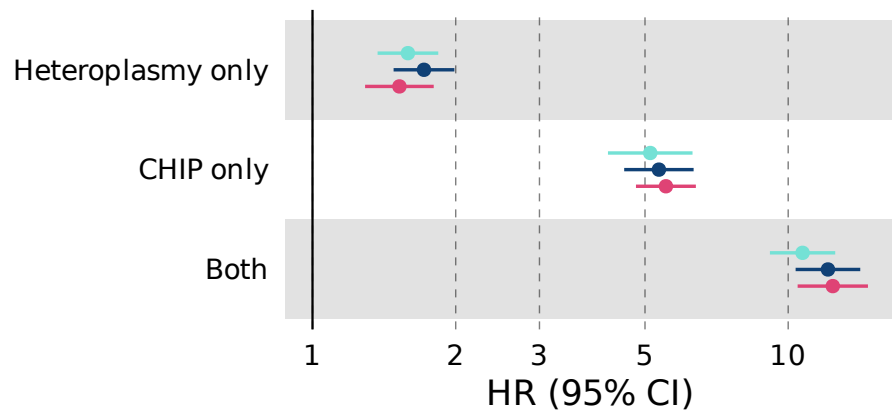

**B**

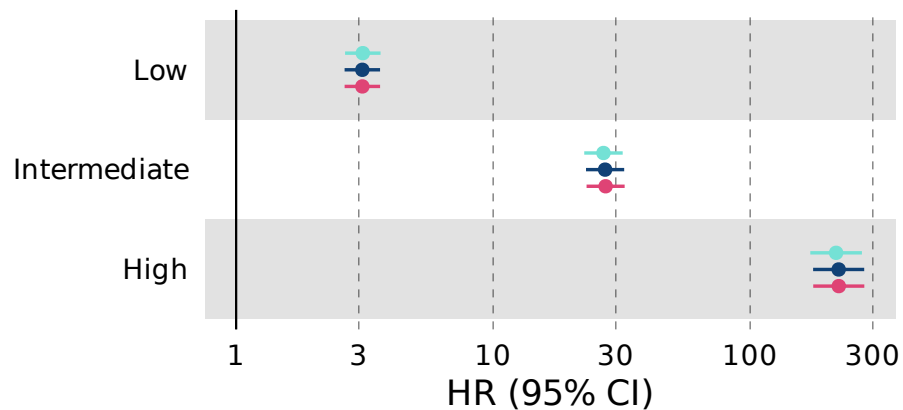

**C**

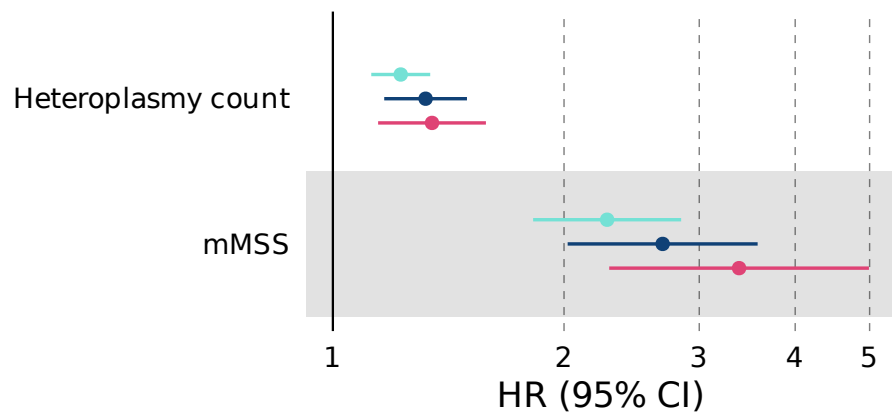

**D**

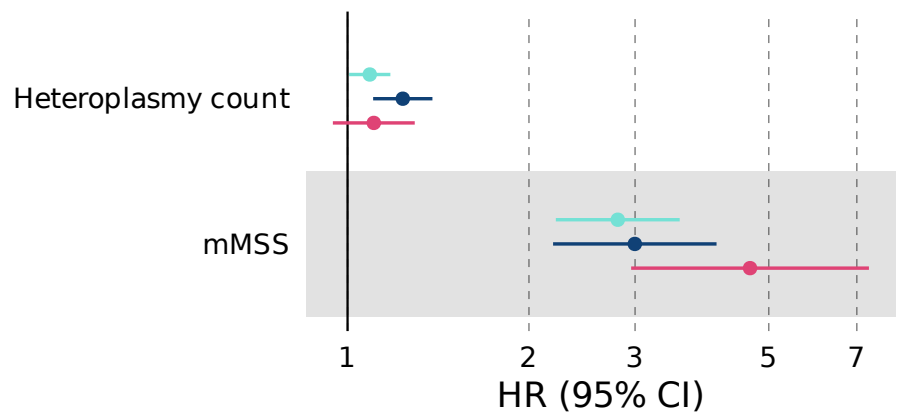

Supplement: Supplementary file [file media-11.pdf]
