# Supplementary material for: Mitochondrial heteroplasmy improves risk prediction for myeloid neoplasms
Source: bioRxiv or medRxiv preprint supplement (doi:10.1101/2024.04.07.24305454), 2024-04-08

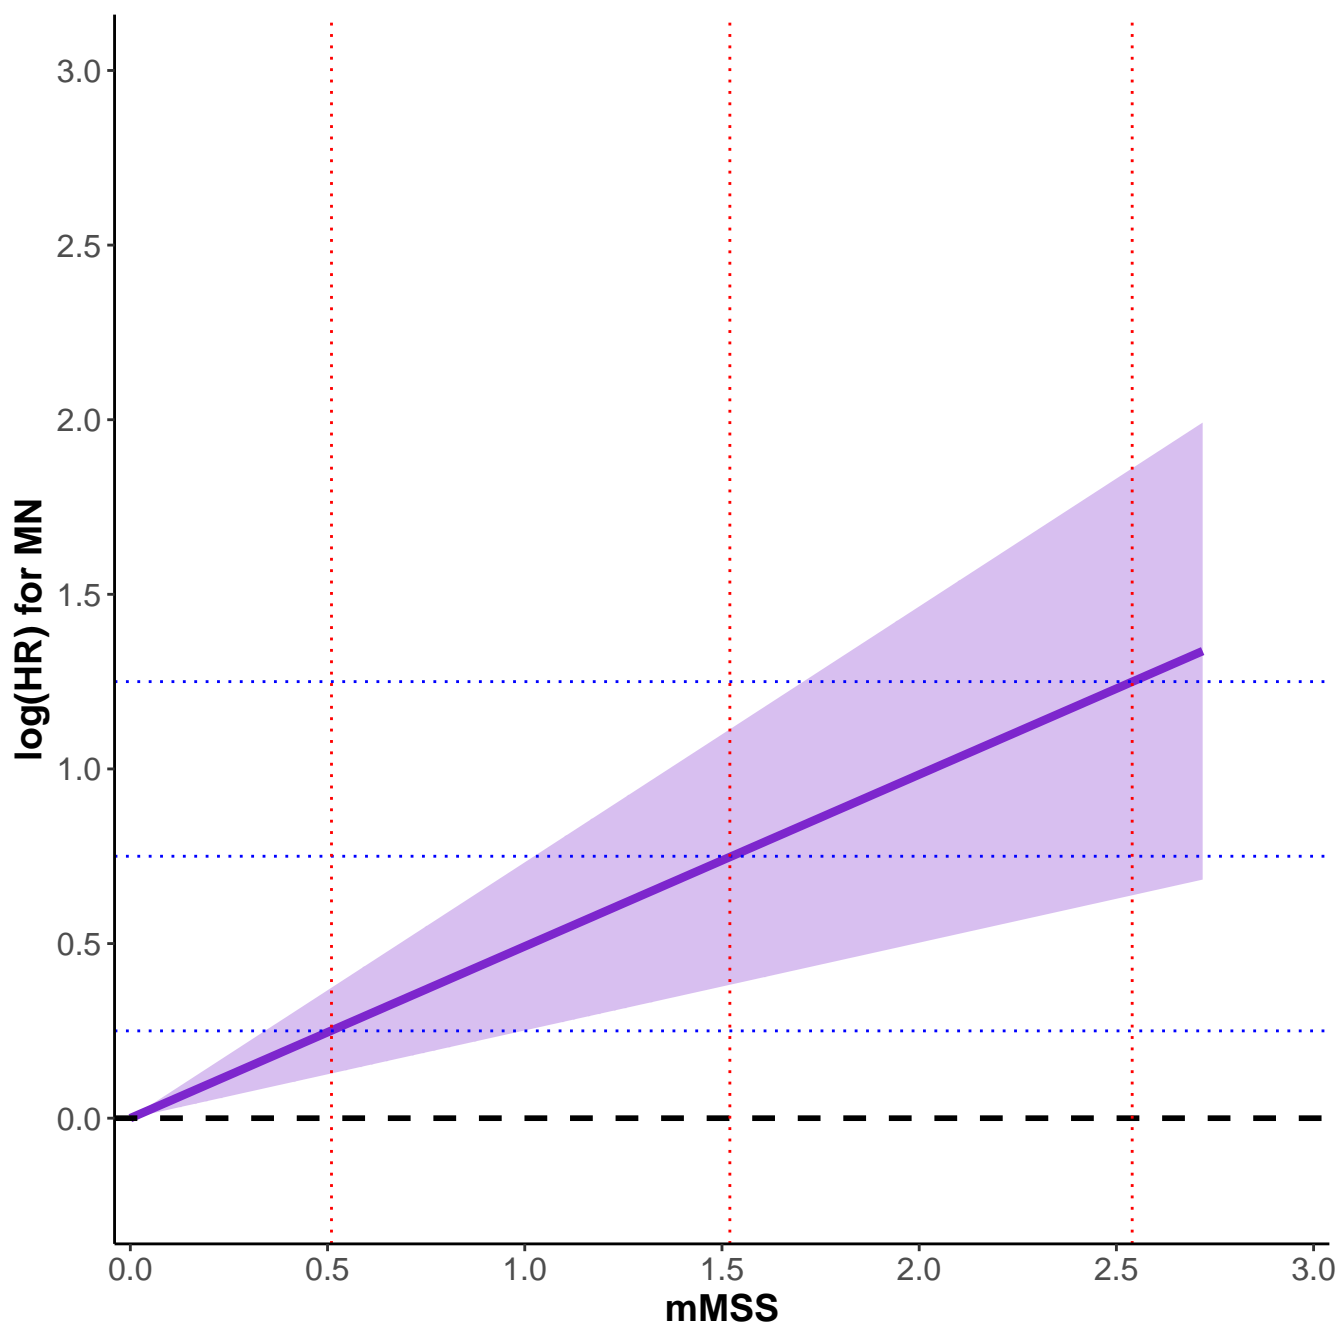

Supplement: Supplementary file [file media-12.pdf]
